# Supplementary material for: Synthesis of a novel triphenylamine-based multifunctional fluorescent probe for continuous recognition applications
Source: Royal Society of Chemistry journal article supplement (doi:10.1039/d2nj05116h), 2023-01-01
Supplement: d2nj05116h1.pdf [file d2nj05116h1.pdf]

Supporting Information for

**Synthesis of a novel triphenylamine based multifunctional fluorescent probe for continuous recognition application**

Xiaoyong Tian<sup>1</sup>, Kezhen Zhang<sup>1</sup>, Nan Wang<sup>2</sup>, Baijie Cheng<sup>2</sup>, Hongyao Xu<sup>1\*</sup>, Shanyi Guang<sup>2\*</sup>

<sup>1</sup>State Key Laboratory for Modification of Chemical Fibers and Polymers Materials & College of Materials Sciences and Engineering, Donghua University, Shanghai, 201620, China College of Chemistry, and Chemical Engineering and Biotechnology, Donghua University, Shanghai, 201620, China

<sup>2</sup> College of Chemistry, and Chemical Engineering and Biotechnology, Donghua University, Shanghai, 201620, China

**Contents of this file**

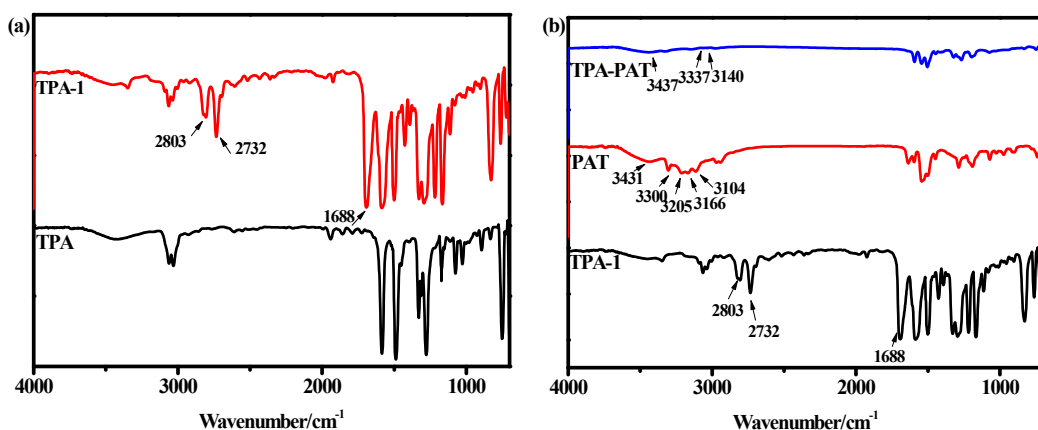

**S1 Infrared contrast of (a)TPA and TPA-1; (b)TPA-1, PAT and TPA-PAT**

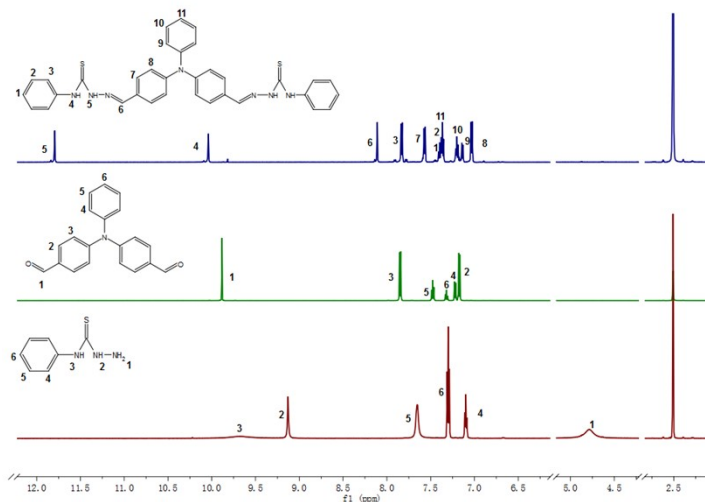

## S2 <sup>1</sup>H NMR comparison of PAT, TPA-1 and TPA-PAT

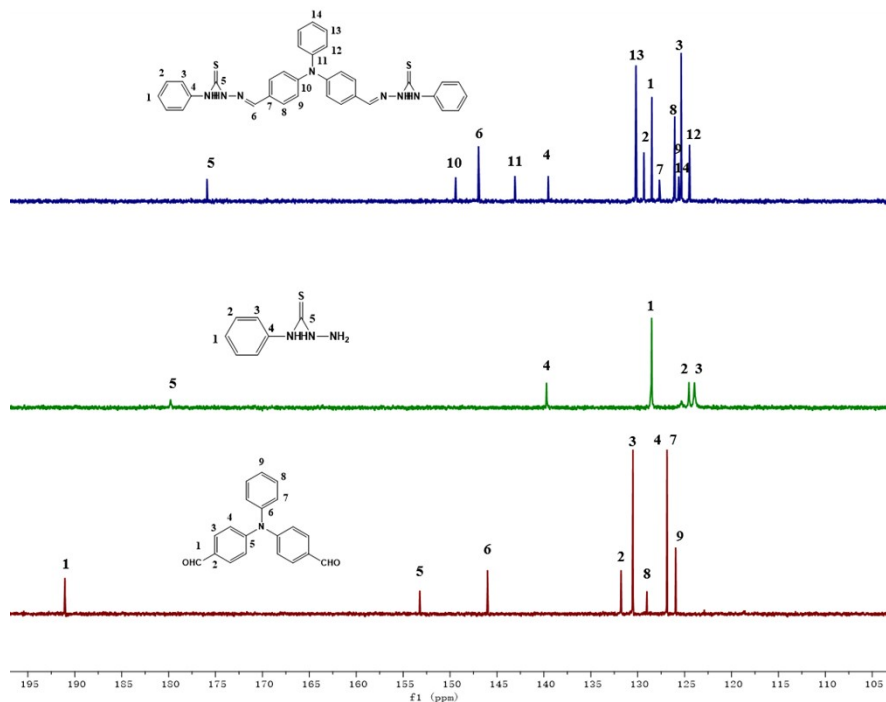

## S3 <sup>13</sup>C NMR comparison of PAT, TPA-1 and TPA-PAT

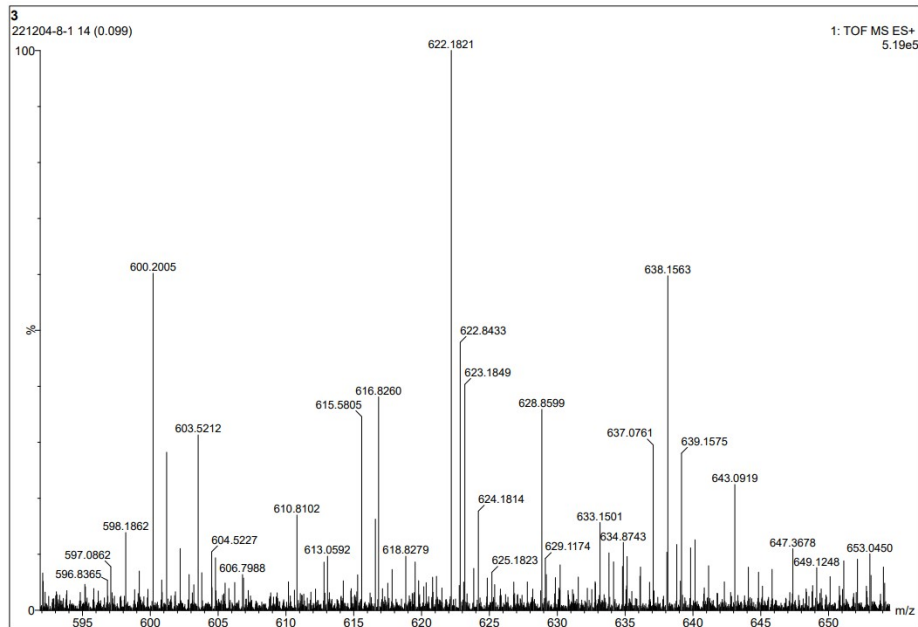

## S4 High-resolution mass spectrometry of TPA-PAT
